# Supplementary figures and images for: The Diversity and Growth-Promoting Potential of the Endophytic Fungi of Neuwiedia singapureana (Orchidaceae) in China
Source: MDPI journal article supplement (doi:10.3390/d16010034), 2024-01-04

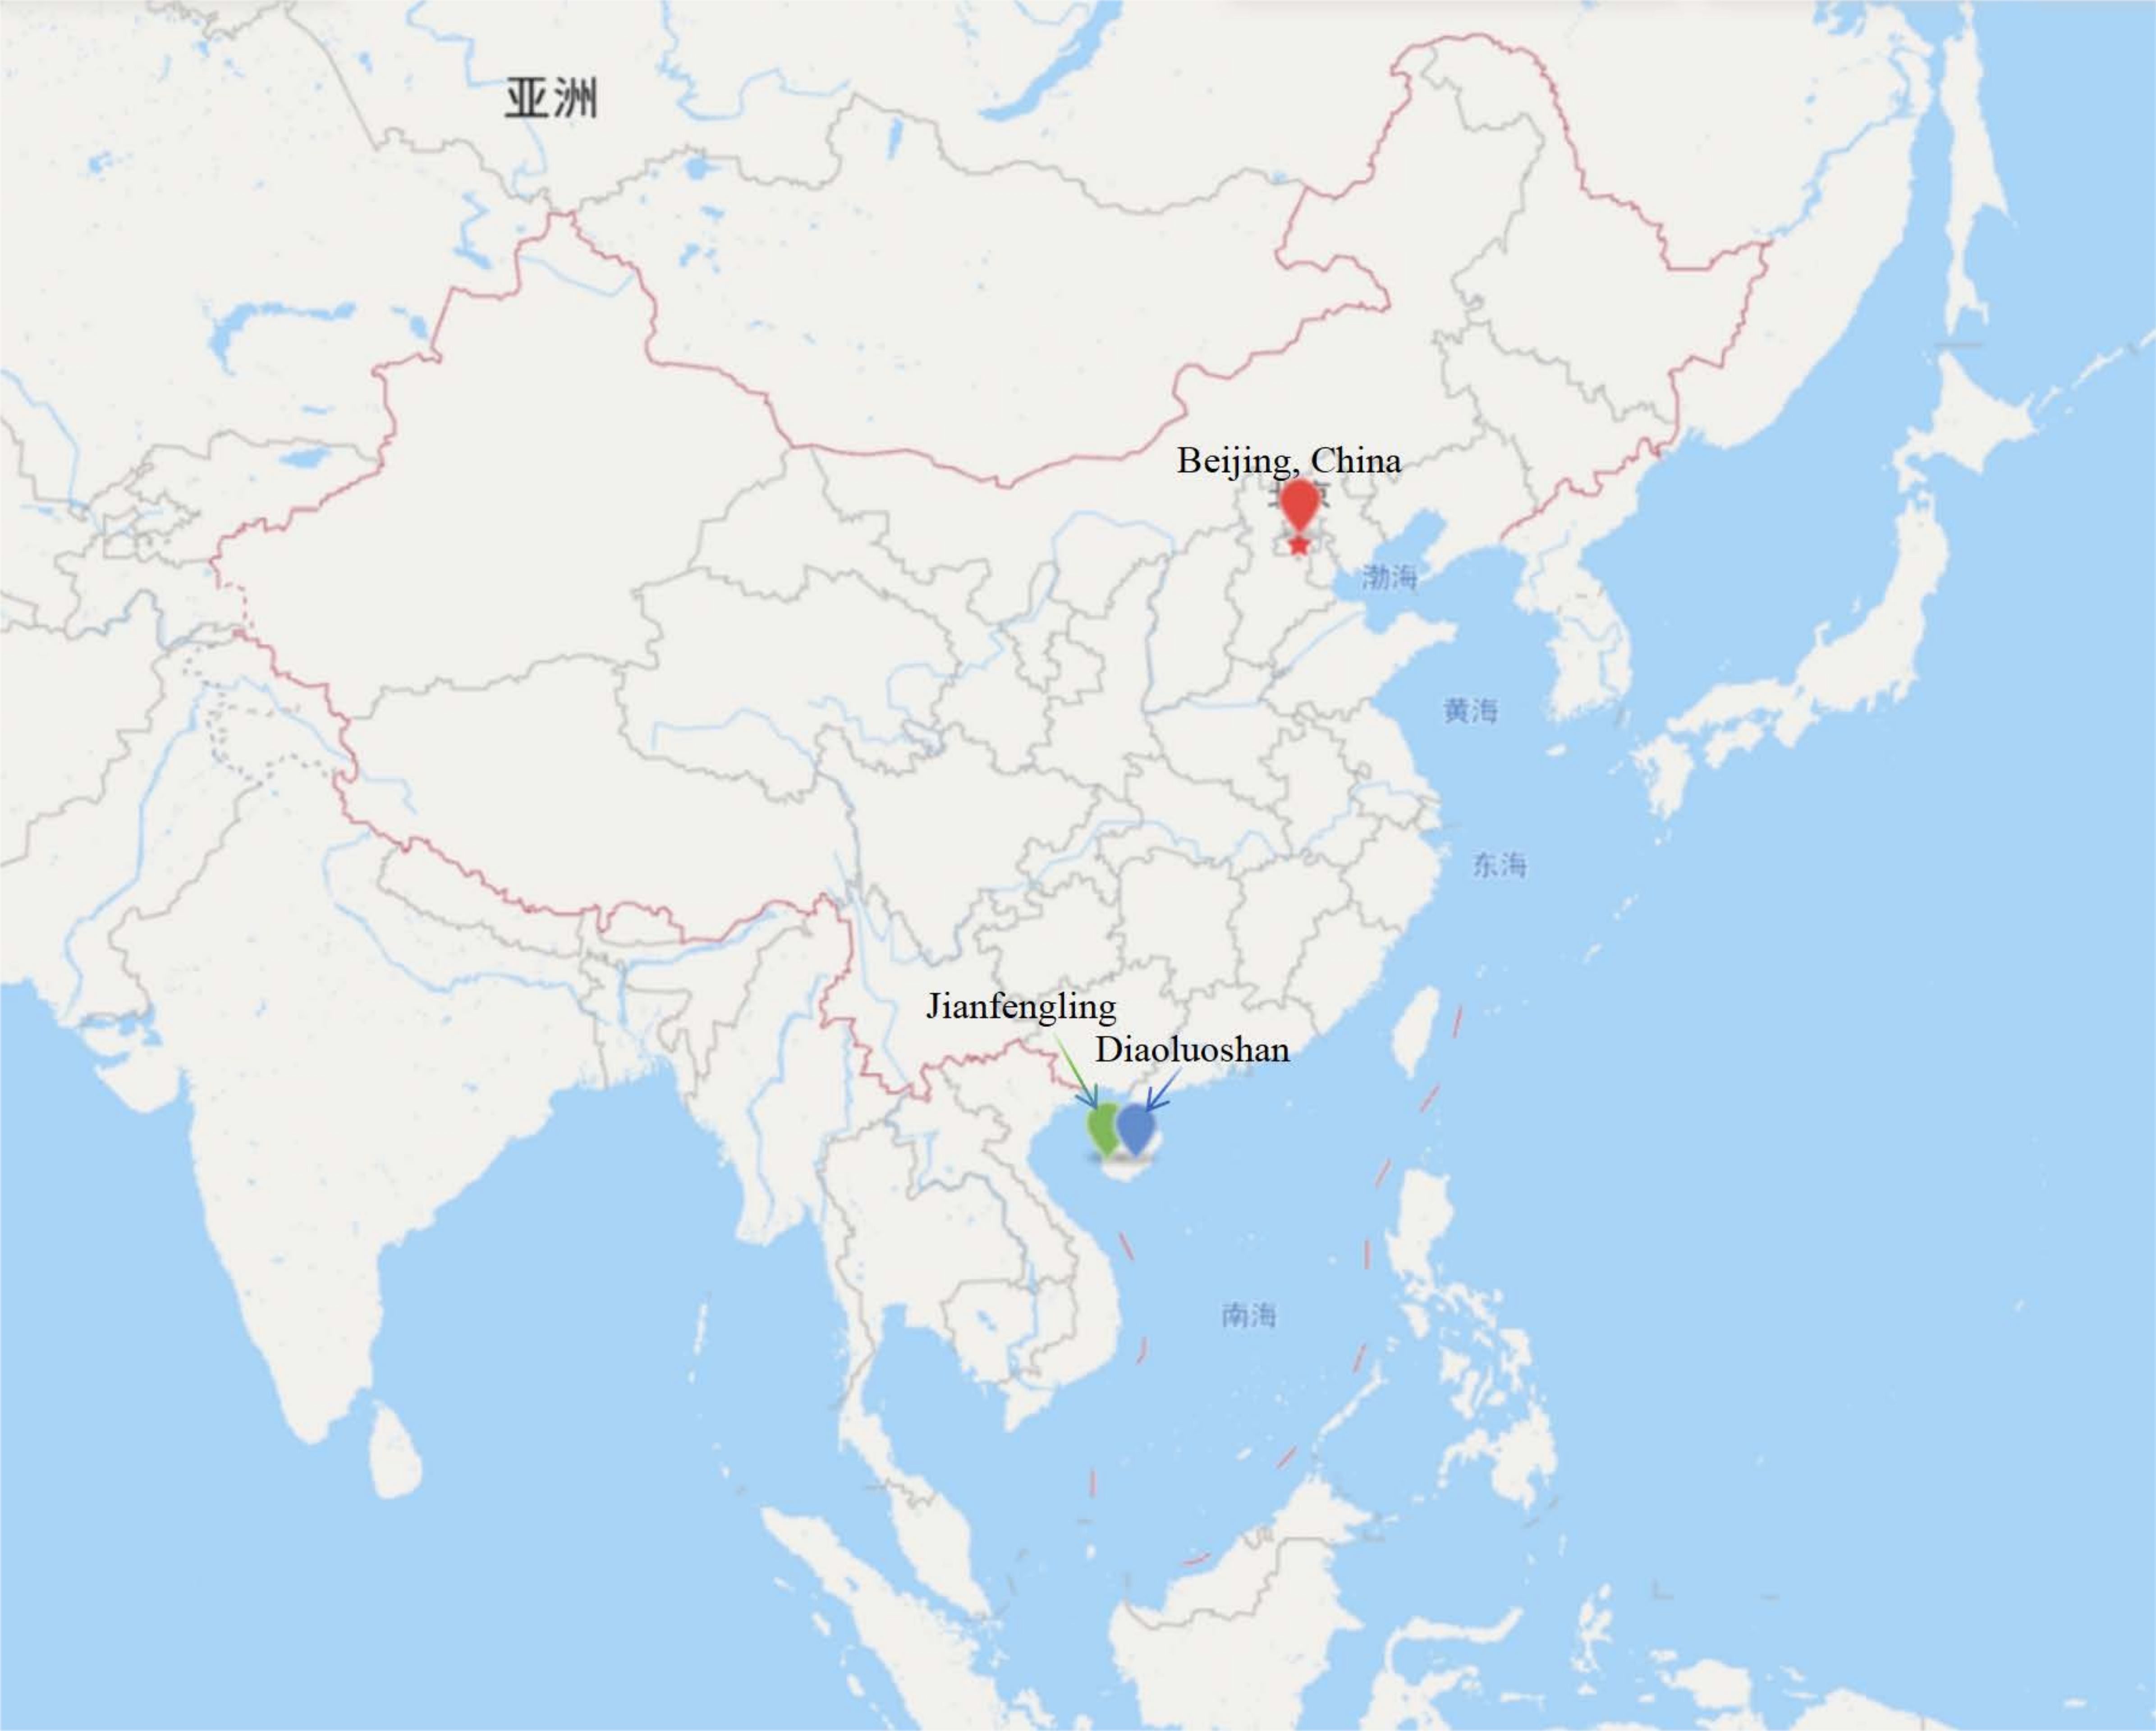

亚洲

Beijing, China

渤海

黄海

东海

Jianfengling

Diaoluoshan

南海

Supplement: s1 [file s1]
